# Supplementary material for: Life cycle complexity and body mass drive erratic changes in climate vulnerability across ontogeny in a seasonally migrating butterfly
Source: PubMed Central journal article supplement (PMC10401068; doi:10.1093/conphys/coad058), 2023-08-12
Supplement: web_material_coad058.pdf [file web_material_coad058.pdf]

## Supporting Information

**Table S1.** Total number of individuals and number of families (in parentheses) reared under the 20 °C or 30 °C developmental acclimation temperature treatments and assessed for physiological traits (both  $CT_{max}$  and RMR  $Q_{10}$  unless otherwise indicated) in phase 1 and 2 of the experiment. Note that due to a respirometry equipment malfunction, three recordings for animals in the 30 °C acclimation treatment were not usable, and thus RMR  $Q_{10}$  values could not be calculated.

| <b>Experiment phase</b> | <b>Developmental stage</b> | <b>20 °C developmental acclimation</b>                                         | <b>20 °C developmental acclimation</b>                                           | <b>30 °C developmental acclimation</b>                                         | <b>30 °C developmental acclimation</b>                                           |
|-------------------------|----------------------------|--------------------------------------------------------------------------------|----------------------------------------------------------------------------------|--------------------------------------------------------------------------------|----------------------------------------------------------------------------------|
|                         |                            | <b><math>CT_{max}</math>, total number of individuals (Number of families)</b> | <b>RMR <math>Q_{10}</math>, total number of individuals (Number of families)</b> | <b><math>CT_{max}</math>, total number of individuals (Number of families)</b> | <b>RMR <math>Q_{10}</math>, total number of individuals (Number of families)</b> |
| 1                       | 3 <sup>rd</sup> instar     | 33 (11)                                                                        | 33 (11)                                                                          | 38 (11)                                                                        | 38 (11)                                                                          |
|                         | 5 <sup>th</sup> instar     | 33 (11)                                                                        | 33 (11)                                                                          | 31 (10)                                                                        | 31 (10)                                                                          |
|                         | Pupa*                      | –                                                                              | 34 (11)                                                                          | –                                                                              | 30 (11)                                                                          |
|                         | Adult**                    | 31 (11)                                                                        | –                                                                                | 39 (7)                                                                         | –                                                                                |

|   |                        |        |        |        |        |
|---|------------------------|--------|--------|--------|--------|
| 2 | 3 <sup>rd</sup> instar | 15 (5) | 15 (5) | 15 (5) | 15 (5) |
|   | 4 <sup>th</sup> instar | 31 (5) | 31 (5) | 32 (5) | 32 (5) |
|   | Adult                  | 30 (5) | 30 (5) | 31 (5) | 28 (5) |

\* RMR  $Q_{10}$  measurements only

\*\*  $CT_{max}$  measurements only

**Table S2.** Statistical significance (test statistics and *P*-values) of predictors from linear mixed effects models of body mass and age as functions of developmental stage, including developmental acclimation temperature, stage, and their interaction. For acclimation temperature *ndf* = 1; for stage and its interaction with acclimation temperature, *ndf* = 4. The *ddf* = 867 for the model of body mass and the *ddf* = 1377 for the model of age. Significant effects (*P* < 0.05) have bolded *P*-values.

| <b>Response</b> | <b>Term</b>         | <b><i>F</i></b> | <b><i>P</i></b>   |
|-----------------|---------------------|-----------------|-------------------|
| Body mass       | Acclimation         | 6.43            | <b>0.0114</b>     |
|                 | Stage               | 261             | <b>&lt;0.0001</b> |
|                 | Acclimation × Stage | 22.5            | <b>&lt;0.0001</b> |
| Age             | Acclimation         | 6150            | <b>&lt;0.0001</b> |
|                 | Stage               | 4560            | <b>&lt;0.0001</b> |
|                 | Acclimation × Stage | 2150            | <b>&lt;0.0001</b> |

**Table S3.** Estimated marginal means and standard errors for body mass (natural log transformed, mg) and age at a given developmental stage (days) across the two developmental acclimation temperature treatments from the models presented in Table S2.

| <b>Response</b> | <b>Acclimation temperature</b> | <b>Stage</b>           | <b>Estimate</b> | <b>SE</b> |
|-----------------|--------------------------------|------------------------|-----------------|-----------|
| Body mass       | 20 °C                          | 3 <sup>rd</sup> instar | 1.83            | 0.0304    |
|                 |                                | 4 <sup>th</sup> instar | 3.46            | 0.054     |
|                 |                                | 5 <sup>th</sup> instar | 4.95            | 0.0499    |
|                 |                                | Pupa                   | 6.44            | 0.0476    |
|                 |                                | Adult                  | 5.78            | 0.0598    |
|                 | 30 °C                          | 3 <sup>rd</sup> instar | 1.91            | 0.0307    |
|                 |                                | 4 <sup>th</sup> instar | 4.1             | 0.0409    |
|                 |                                | 5 <sup>th</sup> instar | 5.19            | 0.0486    |
|                 |                                | Pupa                   | 6.39            | 0.0491    |
|                 |                                | Adult                  | 5.72            | 0.0624    |

|     |       |                        |      |       |
|-----|-------|------------------------|------|-------|
| Age | 20 °C | 3 <sup>rd</sup> instar | 14.1 | 0.129 |
|     |       | 4 <sup>th</sup> instar | 17.9 | 0.137 |
|     |       | 5 <sup>th</sup> instar | 22.2 | 0.143 |
|     |       | Pupa                   | 30.9 | 0.155 |
|     |       | Adult                  | 43.2 | 0.157 |
|     | 30 °C | 3 <sup>rd</sup> instar | 5.52 | 0.13  |
|     |       | 4 <sup>th</sup> instar | 7.38 | 0.137 |
|     |       | 5 <sup>th</sup> instar | 9.15 | 0.143 |
|     |       | Pupa                   | 12.9 | 0.152 |
|     |       | Adult                  | 17.9 | 0.154 |

**Table S4.** Pairwise post-hoc comparisons for the differences in physiological traits,  $CT_{max}$  and RMR  $Q_{10}$ , between developmental stages from mass-dependent models for a given developmental acclimation temperature. Contrasts are given such that the later developmental stage is subtracted from the earlier stage. For stage contrast abbreviations, 3, 4, and 5 correspond with their respective larval instars, P indicates pupae, and A indicates adults. For  $CT_{max}$ , ddf = 336; for RMR  $Q_{10}$ , ddf = 325. Significant contrasts ( $P < 0.05$ ) have bolded  $P$ -values.

| <b>Response</b> | <b>Acclimation temperature</b> | <b>Contrast</b> | <b>Estimate</b> | <b>SE</b> | <b><i>t</i></b> | <b><i>P</i></b>   |
|-----------------|--------------------------------|-----------------|-----------------|-----------|-----------------|-------------------|
| $CT_{max}$      | 20 °C                          | 3 - 4           | 1.49            | 0.244     | 6.1             | <b>&lt;0.0001</b> |
|                 |                                | 3 - 5           | 2.13            | 0.236     | 9.02            | <b>&lt;0.0001</b> |
|                 |                                | 3 - A           | 1.22            | 0.201     | 6.06            | <b>&lt;0.0001</b> |
|                 |                                | 4 - 5           | 0.641           | 0.269     | 2.39            | 0.0818            |
|                 |                                | 4 - A           | -0.269          | 0.232     | -1.16           | 0.652             |
|                 |                                | 5 - A           | -0.91           | 0.227     | -4.01           | <b>0.000439</b>   |
|                 | 30 °C                          | 3 - 4           | 2.15            | 0.238     | 9.03            | <b>&lt;0.0001</b> |
|                 |                                | 3 - 5           | 1.48            | 0.236     | 6.27            | <b>&lt;0.0001</b> |

|              |       |       |         |       |        |                   |
|--------------|-------|-------|---------|-------|--------|-------------------|
|              |       | 3 - A | 1.26    | 0.191 | 6.62   | <b>&lt;0.0001</b> |
|              |       | 4 - 5 | -0.667  | 0.271 | -2.46  | 0.0677            |
|              |       | 4 - A | -0.883  | 0.226 | -3.91  | <b>0.000642</b>   |
|              |       | 5 - A | -0.216  | 0.227 | -0.951 | 0.777             |
| RMR $Q_{10}$ | 20 °C | 3 - 4 | -0.313  | 0.106 | -2.96  | <b>0.0268</b>     |
|              |       | 3 - 5 | -0.664  | 0.101 | -6.58  | <b>&lt;0.0001</b> |
|              |       | 3 - P | -0.352  | 0.1   | -3.52  | <b>0.00444</b>    |
|              |       | 3 - A | -0.684  | 0.107 | -6.42  | <b>&lt;0.0001</b> |
|              |       | 4 - 5 | -0.351  | 0.118 | -2.98  | <b>0.0253</b>     |
|              |       | 4 - P | -0.0394 | 0.117 | -0.337 | 0.997             |
|              |       | 4 - A | -0.371  | 0.113 | -3.27  | <b>0.0104</b>     |
|              |       | 5 - P | 0.312   | 0.108 | 2.88   | <b>0.0344</b>     |
|              |       | 5 - A | -0.0202 | 0.118 | -0.171 | 1                 |

|  |       |       |         |       |        |                   |
|--|-------|-------|---------|-------|--------|-------------------|
|  |       | P - A | -0.332  | 0.118 | -2.82  | <b>0.0407</b>     |
|  | 30 °C | 3 - 4 | -0.783  | 0.103 | -7.59  | <b>&lt;0.0001</b> |
|  |       | 3 - 5 | -0.81   | 0.101 | -8.03  | <b>&lt;0.0001</b> |
|  |       | 3 - P | -0.434  | 0.102 | -4.25  | <b>0.000273</b>   |
|  |       | 3 - A | -0.732  | 0.107 | -6.81  | <b>&lt;0.0001</b> |
|  |       | 4 - 5 | -0.0279 | 0.119 | -0.236 | 0.999             |
|  |       | 4 - P | 0.349   | 0.119 | 2.92   | <b>0.0306</b>     |
|  |       | 4 - A | 0.0508  | 0.115 | 0.442  | 0.992             |
|  |       | 5 - P | 0.377   | 0.114 | 3.31   | <b>0.00899</b>    |
|  |       | 5 - A | 0.0787  | 0.122 | 0.644  | 0.968             |
|  |       | P - A | -0.298  | 0.123 | -2.42  | 0.113             |

**Table S5.** Pairwise post-hoc comparisons for the differences in physiological traits,  $CT_{max}$  and RMR  $Q_{10}$ , between developmental stages mass-independent models for a given developmental acclimation temperature. Contrasts are given such that the later developmental stage is subtracted from the earlier stage. For stage contrast abbreviations, 3, 4, and 5 correspond with their respective larval instars, P indicates pupae, and A indicates adults. For  $CT_{max}$ , ddf = 335; for RMR  $Q_{10}$ , ddf = 324. Significant contrasts ( $P < 0.05$ ) have bolded  $P$ -values.

| <b>Response</b> | <b>Acclimation temperature</b> | <b>Contrast</b> | <b>Estimate</b> | <b>SE</b> | <b><i>t</i></b> | <b><i>P</i></b> |
|-----------------|--------------------------------|-----------------|-----------------|-----------|-----------------|-----------------|
| $CT_{max}$      | 20 °C                          | 3 - 4           | 0.968           | 0.393     | 2.46            | 0.0678          |
|                 |                                | 3 - 5           | 1.14            | 0.633     | 1.8             | 0.274           |
|                 |                                | 3 - A           | 0.0291          | 0.735     | 0.0395          | 1               |
|                 |                                | 4 - 5           | 0.173           | 0.387     | 0.447           | 0.97            |
|                 |                                | 4 - A           | -0.939          | 0.461     | -2.04           | 0.177           |
|                 |                                | 5 - A           | -1.11           | 0.256     | -4.34           | <b>0.000113</b> |
|                 | 30 °C                          | 3 - 4           | 1.39            | 0.51      | 2.72            | <b>0.0344</b>   |
|                 |                                | 3 - 5           | 0.46            | 0.651     | 0.706           | 0.895           |

|              |       |       |          |       |         |                 |
|--------------|-------|-------|----------|-------|---------|-----------------|
|              |       | 3 - A | 0.121    | 0.706 | 0.172   | 0.998           |
|              |       | 4 - 5 | -0.927   | 0.312 | -2.97   | <b>0.0166</b>   |
|              |       | 4 - A | -1.27    | 0.321 | -3.95   | <b>0.000557</b> |
|              |       | 5 - A | -0.338   | 0.238 | -1.42   | 0.486           |
| RMR $Q_{10}$ | 20 °C | 3 - 4 | -0.0365  | 0.169 | -0.216  | 1               |
|              |       | 3 - 5 | -0.112   | 0.274 | -0.41   | 0.994           |
|              |       | 3 - P | 0.451    | 0.385 | 1.17    | 0.768           |
|              |       | 3 - A | -0.036   | 0.323 | -0.111  | 1               |
|              |       | 4 - 5 | -0.0757  | 0.168 | -0.45   | 0.992           |
|              |       | 4 - P | 0.488    | 0.266 | 1.84    | 0.355           |
|              |       | 4 - A | 0.000575 | 0.207 | 0.00278 | 1               |
|              |       | 5 - P | 0.563    | 0.159 | 3.54    | <b>0.0042</b>   |
|              |       | 5 - A | 0.0763   | 0.127 | 0.6     | 0.975           |

|  |       |       |         |       |        |                |
|--|-------|-------|---------|-------|--------|----------------|
|  |       | P - A | -0.487  | 0.134 | -3.64  | <b>0.00288</b> |
|  | 30 °C | 3 - 4 | -0.358  | 0.226 | -1.58  | 0.51           |
|  |       | 3 - 5 | -0.227  | 0.288 | -0.789 | 0.934          |
|  |       | 3 - P | 0.371   | 0.386 | 0.961  | 0.872          |
|  |       | 3 - A | -0.0788 | 0.326 | -0.242 | 0.999          |
|  |       | 4 - 5 | 0.13    | 0.135 | 0.965  | 0.871          |
|  |       | 4 - P | 0.729   | 0.207 | 3.51   | <b>0.0046</b>  |
|  |       | 4 - A | 0.279   | 0.156 | 1.78   | 0.385          |
|  |       | 5 - P | 0.598   | 0.153 | 3.91   | <b>0.00106</b> |
|  |       | 5 - A | 0.148   | 0.127 | 1.17   | 0.768          |
|  |       | P - A | -0.45   | 0.138 | -3.27  | <b>0.0103</b>  |

**Table S6.** Statistical tests of potential interaction effects between sex, body mass, and developmental acclimation temperature treatment on adult  $CT_{max}$  and RMR  $Q_{10}$ , and pupal RMR  $Q_{10}$ . The ndf for all terms was 1, and the ddf for adult  $CT_{max}$  and RMR  $Q_{10}$ , and pupal RMR  $Q_{10}$  were 86, 35, and 39, respectively. Significant effects ( $P < 0.05$ ) have bolded  $P$ -values.

| <b>Response</b> | <b>Stage</b> | <b>Term</b>                      | <b><i>F</i></b> | <b><i>P</i></b> |
|-----------------|--------------|----------------------------------|-----------------|-----------------|
| $CT_{max}$      | Adult        | Body mass                        | 1.33            | 0.252           |
|                 |              | Acclimation                      | 4.78            | <b>0.0315</b>   |
|                 |              | Sex                              | 0.0101          | 0.92            |
|                 |              | Acclimation ×<br>Body mass       | 2.11            | 0.15            |
|                 |              | Body mass × Sex                  | 0.038           | 0.846           |
|                 |              | Acclimation × Sex                | 0.0646          | 0.8             |
|                 |              | Acclimation ×<br>Body mass × Sex | 0.0208          | 0.886           |
| RMR $Q_{10}$    | Pupa         | Body mass                        | 0.259           | 0.613           |

|  |       |                                  |        |       |
|--|-------|----------------------------------|--------|-------|
|  |       | Acclimation                      | 1.44   | 0.237 |
|  |       | Sex                              | 1.44   | 0.237 |
|  |       | Acclimation ×<br>Body mass       | 1.46   | 0.234 |
|  |       | Body mass × Sex                  | 0.767  | 0.386 |
|  |       | Acclimation × Sex                | 2.22   | 0.145 |
|  |       | Acclimation ×<br>Body mass × Sex | 1.52   | 0.225 |
|  | Adult | Body mass                        | 0.1    | 0.754 |
|  |       | Acclimation                      | 0.088  | 0.768 |
|  |       | Sex                              | 0.0656 | 0.799 |
|  |       | Acclimation ×<br>Body mass       | 0.0121 | 0.913 |
|  |       | Body mass × Sex                  | 0.0771 | 0.783 |
|  |       | Acclimation × Sex                | 0.13   | 0.72  |

|  |  |                                  |        |       |
|--|--|----------------------------------|--------|-------|
|  |  | Acclimation ×<br>Body mass × Sex | 0.0284 | 0.867 |
|--|--|----------------------------------|--------|-------|
